# Supplementary material for: Endolithic Boring Enhance the Deep-sea Carbonate Lithification on the Southwest Indian Ridge
Source: Copernicus journal article supplement (doi:10.5194/bg-2018-46), 2018-02-15
Supplement: Supplementary file [file bg-2018-46-AC2-supplement.pdf]

| Sample NO. | CaO   | SiO <sub>2</sub> | Al <sub>2</sub> O <sub>3</sub> | Na <sub>2</sub> O | SO <sub>3</sub> | Fe <sub>2</sub> O <sub>3</sub> | MnO  | K <sub>2</sub> O | P <sub>2</sub> O <sub>5</sub> | Cr <sub>2</sub> O <sub>3</sub> | L.O.I | Total  |
|------------|-------|------------------|--------------------------------|-------------------|-----------------|--------------------------------|------|------------------|-------------------------------|--------------------------------|-------|--------|
| C1         | 87.60 | 5.01             | 1.60                           | 1.26              | 1.01            | 0.99                           | 0.08 | 0.14             | 0.12                          | 0.07                           | 2.10  | 100.00 |
| C2         | 89.39 | 4.73             | 1.54                           | 0.49              | 1.10            | 0.91                           | 0.07 | 0.09             | 0.12                          | 0.06                           | 1.50  | 100.00 |
| C3         | 87.81 | 5.02             | 1.64                           | 1.01              | 0.91            | 1.08                           | 0.09 | 0.13             | 0.14                          | 0.07                           | 2.10  | 100.00 |
| C4         | 88.35 | 4.46             | 1.53                           | 1.25              | 1.06            | 0.88                           | 0.06 | 0.15             | 0.11                          | 0.07                           | 2.07  | 100.00 |
| C5         | 90.70 | 4.09             | 1.04                           | 0.45              | 0.84            | 1.09                           | N.D. | 0.12             | 0.08                          | 0.09                           | 1.50  | 100.00 |
| C6         | 90.91 | 4.42             | 1.12                           | 0.44              | 0.61            | 1.11                           | 0.05 | 0.16             | 0.11                          | 0.09                           | 0.99  | 100.00 |
| C7         | 90.49 | 4.37             | 1.14                           | 0.32              | 1.21            | 1.18                           | 0.08 | N.D.             | 0.10                          | 0.07                           | 1.04  | 100.00 |
| C8         | 89.33 | 4.88             | 1.18                           | 0.40              | 1.37            | 1.24                           | 0.06 | 0.15             | 0.09                          | 0.06                           | 1.23  | 100.00 |
| M1         | 84.31 | 4.64             | 1.22                           | 0.50              | 2.18            | 3.12                           | 1.57 | 0.14             | 0.20                          | N.D.                           | 1.96  | 99.83  |

| Sample NO. | Li     | Be    | Sc    | V      | Cr    | Co     | Ni     | Cu     | Zn     | Rb    | Sr       | Y      | Zr    | Nb    |
|------------|--------|-------|-------|--------|-------|--------|--------|--------|--------|-------|----------|--------|-------|-------|
| C1         | 12.394 | 0.151 | 1.327 | 9.067  | 6.101 | 7.499  | 16.927 | 16.284 | 8.453  | 2.272 | 1415.280 | 7.398  | 5.971 | 0.774 |
| C2         | 14.326 | 0.030 | 1.541 | 9.584  | 6.823 | 8.314  | 14.787 | 22.730 | 12.296 | 1.971 | 1570.712 | 7.794  | 6.433 | 0.710 |
| C3         | 9.924  | 0.060 | 1.452 | 10.544 | 7.200 | 16.402 | 13.308 | 14.540 | 6.429  | 2.073 | 1408.932 | 8.692  | 6.449 | 0.841 |
| C4         | 5.187  | 0.070 | 1.229 | 8.446  | 5.837 | 5.697  | 10.295 | 13.203 | 8.925  | 3.008 | 1355.301 | 6.697  | 4.917 | 0.650 |
| C5         | 9.269  | 0.050 | 1.427 | 6.355  | 4.520 | 3.033  | 9.568  | 27.786 | 10.845 | 2.794 | 1105.468 | 12.841 | 6.884 | 0.549 |
| C6         | 7.282  | 0.150 | 1.307 | 6.643  | 4.289 | 3.621  | 8.299  | 15.830 | 9.795  | 3.092 | 1071.291 | 9.646  | 6.613 | 0.579 |
| C7         | 6.185  | 0.150 | 1.556 | 7.123  | 4.938 | 6.265  | 23.184 | 12.959 | 15.942 | 2.823 | 1071.415 | 11.043 | 6.335 | 0.579 |

|           |        |       |       |        |       |         |         |        |        |       |          |        |        |       |
|-----------|--------|-------|-------|--------|-------|---------|---------|--------|--------|-------|----------|--------|--------|-------|
| <b>C8</b> | 8.970  | 0.160 | 1.804 | 8.559  | 5.833 | 8.389   | 22.501  | 16.538 | 11.005 | 3.067 | 1210.755 | 17.159 | 8.369  | 0.842 |
| <b>M1</b> | 17.389 | 0.270 | 2.805 | 76.871 | 7.806 | 432.418 | 111.399 | 29.926 | 38.920 | 4.272 | 1389.487 | 32.831 | 21.581 | 3.863 |

| Sample NO. | Mo    | In    | Cs    | Ba          | La     | Ce     | Pr    | Nd     | Sm    | Eu    | Gd    | Tb    | Dy    | Ho    | Er    |
|------------|-------|-------|-------|-------------|--------|--------|-------|--------|-------|-------|-------|-------|-------|-------|-------|
| <b>C1</b>  | 0.342 | 0.010 | 0.101 | 161.53<br>1 | 4.724  | 5.981  | 0.965 | 4.342  | 0.824 | 0.231 | 1.076 | 0.151 | 0.955 | 0.221 | 0.613 |
| <b>C2</b>  | 0.340 | 0.000 | 0.110 | 157.97<br>2 | 4.802  | 6.363  | 0.990 | 4.482  | 0.950 | 0.250 | 1.020 | 0.160 | 1.010 | 0.220 | 0.620 |
| <b>C3</b>  | 0.391 | 0.010 | 0.100 | 171.93<br>6 | 5.397  | 7.801  | 1.122 | 4.867  | 0.921 | 0.270 | 1.182 | 0.170 | 1.081 | 0.250 | 0.751 |
| <b>C4</b>  | 0.220 | 0.010 | 0.180 | 131.33<br>2 | 4.188  | 4.987  | 0.870 | 3.528  | 0.730 | 0.210 | 0.880 | 0.120 | 0.880 | 0.190 | 0.570 |
| <b>C5</b>  | 0.150 | 0.010 | 0.180 | 14.327      | 5.757  | 4.879  | 1.137 | 4.879  | 0.978 | 0.259 | 1.167 | 0.190 | 1.267 | 0.319 | 0.938 |
| <b>C6</b>  | 0.160 | 0.010 | 0.180 | 13.665      | 4.818  | 4.768  | 1.017 | 4.269  | 0.888 | 0.219 | 1.077 | 0.160 | 1.057 | 0.229 | 0.728 |
| <b>C7</b>  | 0.319 | 0.010 | 0.140 | 19.573      | 5.357  | 5.367  | 1.067 | 4.599  | 0.978 | 0.209 | 1.227 | 0.170 | 1.197 | 0.279 | 0.838 |
| <b>C8</b>  | 0.261 | 0.010 | 0.110 | 18.141      | 7.497  | 6.344  | 1.413 | 6.254  | 1.213 | 0.321 | 1.674 | 0.251 | 1.724 | 0.421 | 1.293 |
| <b>M1</b>  | 6.498 | 0.020 | 0.150 | 69.355      | 23.288 | 82.052 | 4.831 | 21.082 | 4.342 | 1.058 | 5.500 | 0.789 | 4.991 | 1.098 | 3.204 |

| Sample NO. | Tm    | Yb    | Lu    | Hf    | Ta    | Tl    | Pb    | Th    | U     | ΣREE  | LREE  | HREE | LREE/H<br>REE | δEu  | δCe  | Ce <sub>anom</sub> |
|------------|-------|-------|-------|-------|-------|-------|-------|-------|-------|-------|-------|------|---------------|------|------|--------------------|
| <b>C1</b>  | 0.090 | 0.573 | 0.080 | 0.181 | 0.161 | 0.020 | 3.699 | 0.684 | 0.251 | 20.83 | 17.07 | 3.76 | 4.54          | 0.75 | 0.63 | -0.20              |
| <b>C2</b>  | 0.090 | 0.560 | 0.090 | 0.220 | 0.180 | 0.050 | 4.142 | 0.730 | 0.260 | 21.61 | 17.84 | 3.77 | 4.73          | 0.77 | 0.65 | -0.18              |
| <b>C3</b>  | 0.100 | 0.721 | 0.100 | 0.230 | 0.140 | 0.020 | 2.283 | 0.801 | 0.240 | 24.73 | 20.38 | 4.36 | 4.68          | 0.79 | 0.71 | -0.15              |
| <b>C4</b>  | 0.070 | 0.530 | 0.080 | 0.170 | 0.130 | 0.020 | 0.300 | 0.590 | 0.210 | 17.83 | 14.51 | 3.32 | 4.37          | 0.80 | 0.59 | -0.23              |
| <b>C5</b>  | 0.140 | 0.948 | 0.150 | 0.210 | 0.110 | 0.010 | 0.708 | 0.529 | 0.249 | 23.01 | 17.89 | 5.12 | 3.50          | 0.74 | 0.43 | -0.37              |
| <b>C6</b>  | 0.110 | 0.648 | 0.110 | 0.190 | 0.140 | 0.010 | 0.608 | 0.549 | 0.269 | 20.10 | 15.98 | 4.12 | 3.88          | 0.69 | 0.48 | -0.31              |

|           |       |       |       |       |       |       |        |       |       |        |        |       |      |      |      |       |
|-----------|-------|-------|-------|-------|-------|-------|--------|-------|-------|--------|--------|-------|------|------|------|-------|
| <b>C7</b> | 0.120 | 0.778 | 0.130 | 0.209 | 0.100 | 0.010 | 1.905  | 0.549 | 0.259 | 22.32  | 17.58  | 4.74  | 3.71 | 0.58 | 0.50 | -0.30 |
| <b>C8</b> | 0.190 | 1.243 | 0.200 | 0.281 | 0.120 | 0.020 | 2.486  | 0.712 | 0.271 | 30.04  | 23.04  | 7.00  | 3.29 | 0.69 | 0.43 | -0.37 |
| <b>M1</b> | 0.429 | 2.865 | 0.429 | 0.669 | 0.180 | 0.200 | 60.850 | 4.003 | 0.858 | 155.96 | 136.65 | 19.31 | 7.08 | 0.66 | 1.74 | 0.24  |

$$\delta\text{Eu} = (\text{Eu})_N / 0.5(\text{Sm} + \text{Nd})_N$$

$$\delta\text{Ce} = (\text{Ce})_N / 0.5(\text{La} + \text{Pr})_N$$

$$\text{Ce}_{\text{anom}} = \log(\text{Ce} / \text{Ce}^*)_{\text{SN}} = \log [ 2\text{Ce}_{\text{SN}} / (\text{La}_{\text{SN}} + \text{Pr}_{\text{SN}}) ]$$

**Supplement Table 1** Geochemical character parameters of Carbonate rocks. C1-C4 represent the gray sediment infilled in the burrows, C5-C8 represent the white carbonate and M1 represent the thin black ferromanganese crusts, some white part may be mix unavoidable.

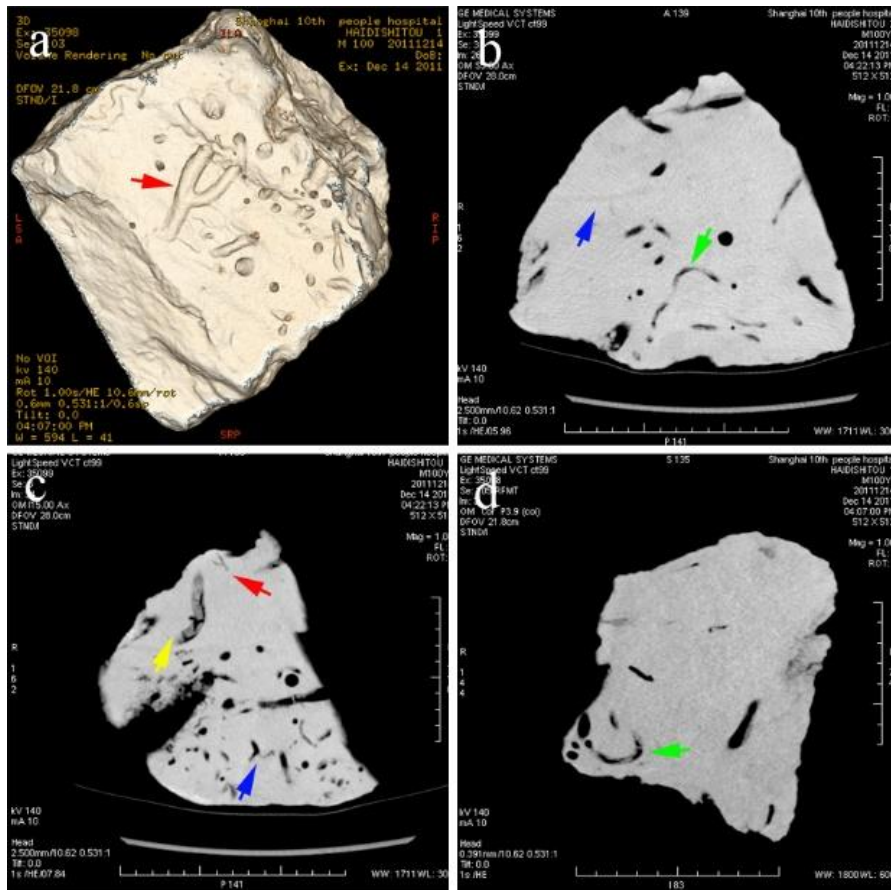

Figure r1 CT images of chalk samples. Arrows in different colors represent different shape of burrows. Red -- Y-shaped, blue -- branched, yellow -- J-shaped and Green -- U-shaped.

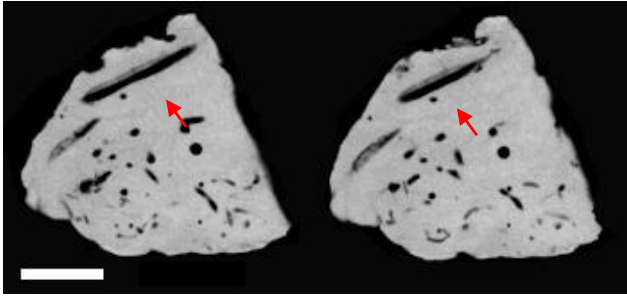

*Figure r2, CT slides of same carbonate sample. Scale bar=10cm*
